# Supplementary material for: IRT5 Probiotics Changes Immune Modulatory Protein Expression in the Extraorbital Lacrimal Glands of an Autoimmune Dry Eye Mouse Model
Source: PubMed Central journal article supplement — Invest Ophthalmol Vis Sci. 2020 Mar 30;61(3):42. doi: 10.1167/iovs.61.3.42 (PMC7401425; doi:10.1167/iovs.61.3.42), 2020-03-30
Supplement: iovs-61-3-42_s001.pdf [file iovs-61-3-42_s001.pdf]

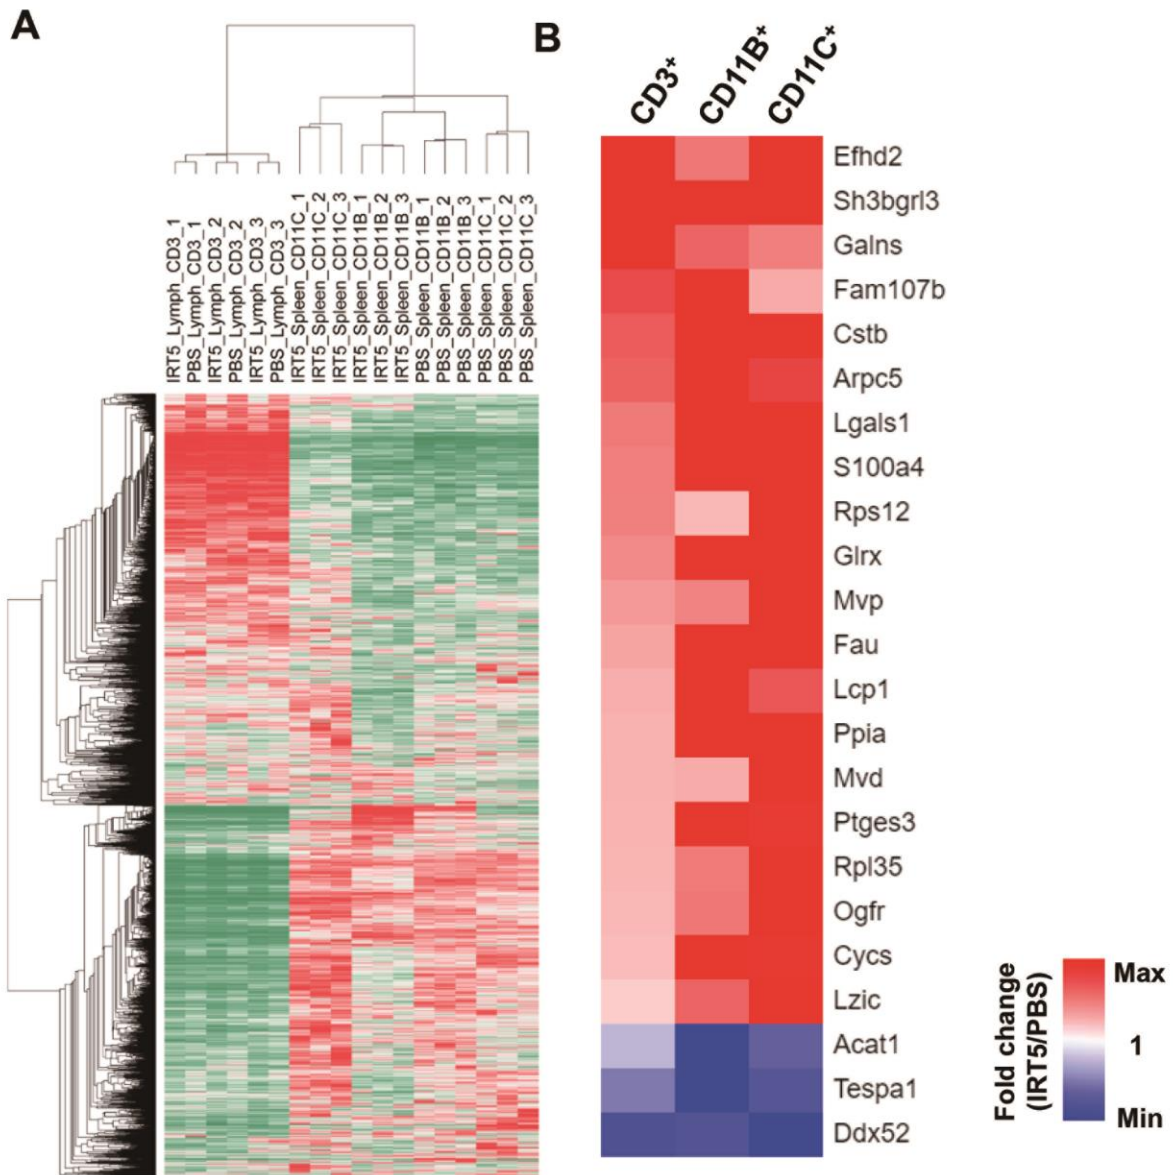

**Supplementary Figure S1.** Heat map showing DEPs between the IRT5-treated- and PBS-treated- groups in the CD3<sup>+</sup> cells of the draining lymph node and in the CD11b<sup>+</sup> or CD11c<sup>+</sup> cells of the spleen. After IRT5 treatment, more DEPs were found in the CD11c<sup>+</sup> or CD11b<sup>+</sup> cells of the spleen than in the CD3<sup>+</sup> cells of the lymph node, and the splenic CD11c<sup>+</sup> cells showed the largest difference between the PBS treated and IRT5-treated groups.
