# Supplementary material for: IRT5 Probiotics Changes Immune Modulatory Protein Expression in the Extraorbital Lacrimal Glands of an Autoimmune Dry Eye Mouse Model
Source: PubMed Central journal article supplement — Invest Ophthalmol Vis Sci. 2020 Mar 30;61(3):42. doi: 10.1167/iovs.61.3.42 (PMC7401425; doi:10.1167/iovs.61.3.42), 2020-03-30
Supplement: iovs-61-3-42_s002.pdf [file iovs-61-3-42_s002.pdf]

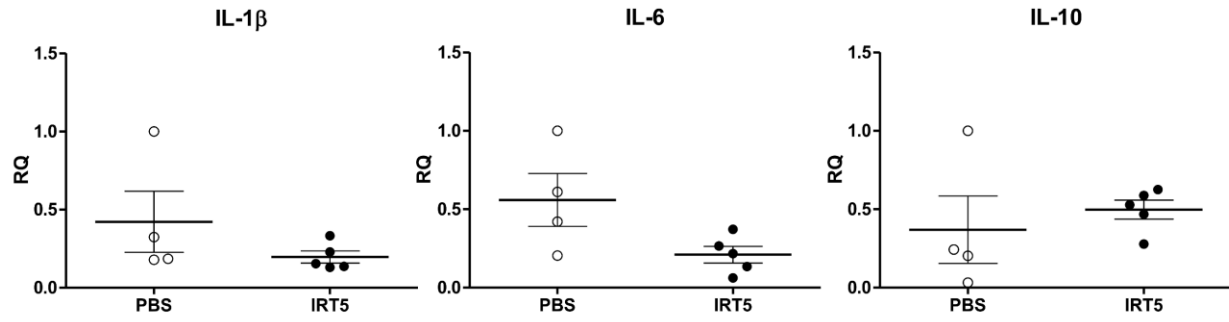

**Supplementary Figure S2.** In the extraorbital lacrimal gland of the IRT5 treated group, IL-1 $\beta$  ( $p = 0.2857$ ) and IL-6 ( $p = 0.1111$ ) were lower and IL-10 ( $p = 0.2857$ ) was higher than in the PBS-treated group, but the differences were not statistically significant.
