# Supplementary material for: IRT5 Probiotics Changes Immune Modulatory Protein Expression in the Extraorbital Lacrimal Glands of an Autoimmune Dry Eye Mouse Model
Source: PubMed Central journal article supplement — Invest Ophthalmol Vis Sci. 2020 Mar 30;61(3):42. doi: 10.1167/iovs.61.3.42 (PMC7401425; doi:10.1167/iovs.61.3.42), 2020-03-30
Supplement: iovs-61-3-42_s003.pdf [file iovs-61-3-42_s003.pdf]

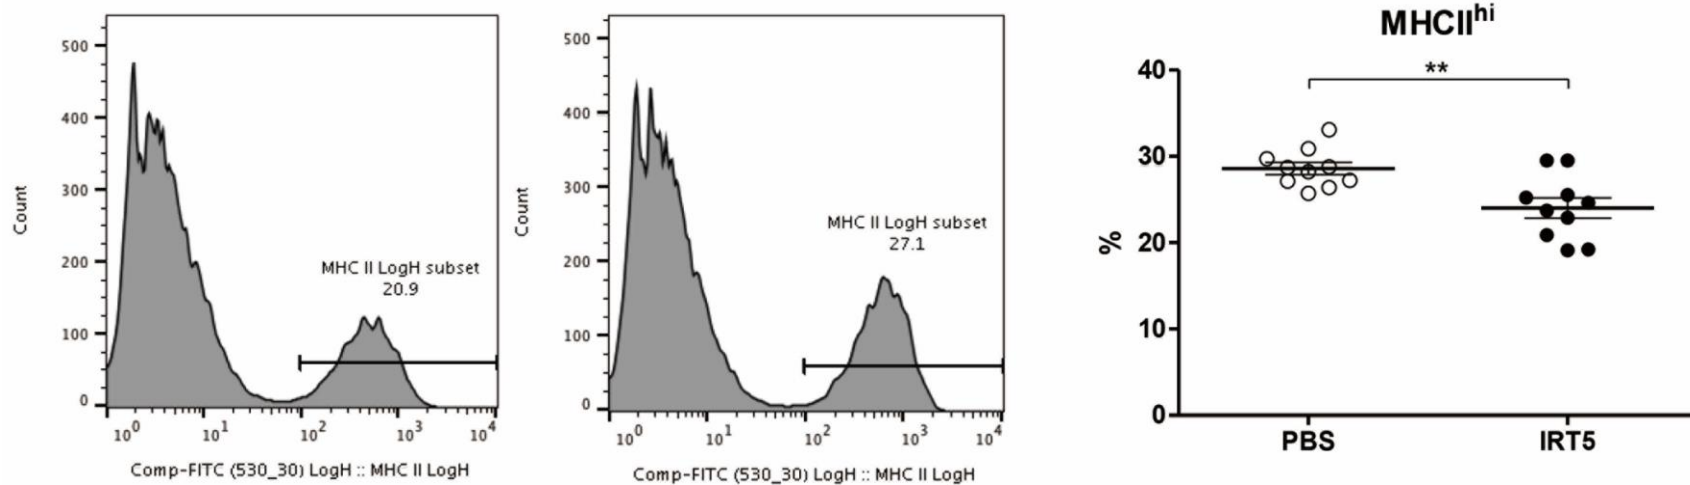

**Supplementary Figure S3.** Retrograde analysis of previous FACS data which included evaluation of the MHCII<sup>hi</sup> cells in cervical lymph nodes was performed to see if this FACS data could support the current proteomic analysis results. This retrograde analysis has not been published elsewhere. The proportion of MHCII<sup>hi</sup> cells in the cervical lymph nodes was significantly lower in the IRT5-treated group (n = 10) compared to the PBS-treated group (n = 10) (p = 0.0052, Mann Whitney test), which is in line with the reduction of MHCII related DEPs in the proteomic results of the current study shown in Table 4.
