# Supplementary material for: IRT5 Probiotics Changes Immune Modulatory Protein Expression in the Extraorbital Lacrimal Glands of an Autoimmune Dry Eye Mouse Model
Source: PubMed Central journal article supplement — Invest Ophthalmol Vis Sci. 2020 Mar 30;61(3):42. doi: 10.1167/iovs.61.3.42 (PMC7401425; doi:10.1167/iovs.61.3.42), 2020-03-30
Supplement: iovs-61-3-42_s007.pdf [file iovs-61-3-42_s007.pdf]

**Supplementary Table S4. Differences in abundance of bacterial communities at species level as assessed by LEfSe**

| <b>Taxon name</b>              | <b>LDA effect size</b> | <b>q-value</b> | <b>Post PBS</b> | <b>Post IRT</b> |
|--------------------------------|------------------------|----------------|-----------------|-----------------|
| <b>Increased</b>               |                        |                |                 |                 |
| Lactobacillus helveticus group | 4.72199                | 0.04025        | 0.00792         | 10.55205        |
| Lactobacillus reuteri group    | 4.50721                | 0.04030        | 3.35561         | 9.78576         |
| KE159605_s                     | 4.17923                | 0.04015        | 1.04655         | 4.06811         |
| Akkermansia muciniphila        | 4.01570                | 0.03431        | 0.00351         | 2.07690         |
| EF602942_s                     | 3.95531                | 0.03913        | 0.55552         | 2.35972         |
| EF406725_s                     | 3.87094                | 0.03439        | 0.00140         | 1.48702         |
| Streptococcus salivarius group | 3.81565                | 0.02891        | 0.00000         | 1.30800         |
| Lactobacillus casei group      | 3.64580                | 0.03467        | 0.00070         | 0.88525         |
| AB606258_s                     | 3.57744                | 0.03821        | 0.15352         | 0.90916         |
| EF603663_s                     | 3.27237                | 0.03443        | 0.00070         | 0.37491         |
| Eubacterium_g23_uc             | 3.18161                | 0.02855        | 0.00000         | 0.30341         |
| EU457191_s                     | 3.15768                | 0.03451        | 0.01612         | 0.30346         |
| EU622736_s                     | 3.05893                | 0.02888        | 0.00000         | 0.22878         |
| EF098800_s                     | 2.93782                | 0.03883        | 0.09017         | 0.26312         |
| AB185622_s                     | 2.91657                | 0.03812        | 0.03215         | 0.19696         |
| JQ084674_s                     | 2.89708                | 0.04009        | 0.10790         | 0.26536         |
| EU456711_s                     | 2.86116                | 0.02885        | 0.00000         | 0.14494         |
| JQ809688_s                     | 2.83217                | 0.02898        | 0.00000         | 0.13550         |
| Lactobacillus hamsteri         | 2.73910                | 0.02908        | 0.00000         | 0.10918         |
| Bifidobacterium bifidum        | 2.70465                | 0.02878        | 0.00000         | 0.10083         |
| AB606400_s                     | 2.60258                | 0.02868        | 0.00000         | 0.07975         |
| AB606283_s                     | 2.59294                | 0.02865        | 0.00000         | 0.07810         |
| Lactobacillus amylovorus group | 2.48917                | 0.02901        | 0.00000         | 0.06131         |
| JN713389_g_uc                  | 2.46472                | 0.03798        | 0.00728         | 0.06480         |
| Aerococcus viridans group      | 2.40735                | 0.02872        | 0.00000         | 0.05076         |
| EF406589_g_uc                  | 2.32092                | 0.03788        | 0.00904         | 0.04973         |
| DQ815799_s                     | 2.30751                | 0.02881        | 0.00000         | 0.03960         |
| EF604636_s                     | 2.26012                | 0.03938        | 0.00221         | 0.03825         |
| EF604965_s                     | 2.24976                | 0.03953        | 0.00511         | 0.04035         |
| EF603305_s                     | 2.15773                | 0.03471        | 0.00301         | 0.03099         |
| DQ815556_s                     | 2.14489                | 0.03864        | 0.00674         | 0.03367         |
| PAC000673_g_uc                 | 2.03560                | 0.02862        | 0.00000         | 0.02115         |
| Lactobacillus brantae group    | 2.01757                | 0.02905        | 0.00000         | 0.01965         |
| <b>Decreased</b>               |                        |                |                 |                 |
| AJ400262_s                     | 4.31015                | 0.03850        | 4.27360         | 0.18893         |

|                        |         |         |         |         |
|------------------------|---------|---------|---------|---------|
| EF603669_s             | 4.03261 | 0.03918 | 2.68468 | 0.52895 |
| FJ879254_s             | 4.00329 | 0.03994 | 3.33471 | 1.31978 |
| Eisenbergiella_uc      | 3.43813 | 0.03793 | 0.85308 | 0.30500 |
| Parabacteroides_uc     | 3.39257 | 0.03807 | 0.73181 | 0.23849 |
| HQ740257_s             | 3.37857 | 0.04004 | 0.48327 | 0.00537 |
| FJ678358_s             | 3.34987 | 0.03989 | 0.61388 | 0.16678 |
| EF604822_s             | 3.34826 | 0.03948 | 0.75529 | 0.30956 |
| EF405130_s             | 3.14639 | 0.03898 | 0.45765 | 0.17815 |
| AB606381_s             | 3.13624 | 0.03840 | 0.36261 | 0.08940 |
| Escherichia coli group | 3.11119 | 0.03958 | 0.30426 | 0.04655 |
| EU458103_s             | 3.09340 | 0.03973 | 0.40677 | 0.15929 |
| FJ880834_s             | 3.05327 | 0.03999 | 0.30188 | 0.07644 |
| EU511112_s             | 3.02506 | 0.03984 | 0.23662 | 0.02548 |
| EF099428_s             | 2.98944 | 0.03893 | 0.33442 | 0.13984 |
| DQ815445_s             | 2.97410 | 0.03859 | 0.20590 | 0.01778 |
| DQ815411_s             | 2.94484 | 0.03854 | 0.27334 | 0.09760 |
| EF604701_s             | 2.93780 | 0.03943 | 0.28300 | 0.11064 |
| AB606367_s             | 2.89469 | 0.03835 | 0.19500 | 0.03834 |
| EF603964_s             | 2.87613 | 0.03933 | 0.16600 | 0.01625 |
| EF099352_s             | 2.86377 | 0.03888 | 0.80682 | 0.66127 |
| EF603786_s             | 2.85278 | 0.03923 | 0.24206 | 0.10050 |
| AB606333_s             | 2.83530 | 0.03830 | 0.18300 | 0.04735 |
| EU509975_s             | 2.82349 | 0.01938 | 0.13223 | 0.00000 |
| EF098562_s             | 2.81147 | 0.03879 | 0.14142 | 0.01313 |
| AB626950_s             | 2.77697 | 0.03845 | 0.20661 | 0.08770 |
| PAC000687_s            | 2.75609 | 0.02820 | 0.11448 | 0.00114 |
| EF098118_s             | 2.62737 | 0.03874 | 0.11051 | 0.02621 |
| FJ881271_s             | 2.57284 | 0.02817 | 0.07347 | 0.00111 |
| EF602810_s             | 2.53034 | 0.03908 | 0.09981 | 0.03281 |
| AB606252_s             | 2.46991 | 0.03816 | 0.08880 | 0.03094 |
| EF604598_s             | 2.45824 | 0.01936 | 0.00299 | 0.00000 |
| AJ400261_s             | 2.40448 | 0.02811 | 0.04819 | 0.00114 |
| EF406589_s             | 2.35629 | 0.03903 | 0.05974 | 0.01895 |
| EF603862_s             | 2.34910 | 0.03928 | 0.07395 | 0.03021 |
| ADDX_s                 | 2.33330 | 0.03427 | 0.04061 | 0.00205 |
| JQ083859_s             | 2.32452 | 0.03463 | 0.04631 | 0.00758 |
| AM183003_s             | 2.30007 | 0.01932 | 0.02788 | 0.00000 |
| HM124260_g_uc          | 2.24703 | 0.03419 | 0.03143 | 0.00305 |
| HM845298_s             | 2.23538 | 0.03459 | 0.03259 | 0.00239 |
| EU845632_s             | 2.23285 | 0.01940 | 0.00735 | 0.00000 |

|                    |         |         |         |         |
|--------------------|---------|---------|---------|---------|
| KE159781_s         | 2.18620 | 0.04020 | 0.02308 | 0.00324 |
| KE159600_g_uc      | 2.17160 | 0.02805 | 0.02683 | 0.00227 |
| EU454374_s         | 2.15556 | 0.03968 | 0.02792 | 0.00494 |
| EU462959_s         | 2.14916 | 0.03978 | 0.02639 | 0.00369 |
| AB009176_g_uc      | 2.14112 | 0.01930 | 0.00519 | 0.00000 |
| LLKB_g_uc          | 2.12040 | 0.03802 | 0.02808 | 0.00221 |
| Clostridium_g18_uc | 2.08712 | 0.03415 | 0.02041 | 0.00379 |
| EU452797_s         | 2.06331 | 0.03963 | 0.01957 | 0.00368 |
| AB606397_s         | 2.03025 | 0.02808 | 0.00953 | 0.00111 |
| EU504286_s         | 2.01065 | 0.02814 | 0.01120 | 0.00056 |
| EF097676_s         | 2.00820 | 0.03869 | 0.04597 | 0.02591 |
| EU771312_s         | 2.00070 | 0.03455 | 0.01787 | 0.00353 |

---
